## Nano-topography sensing by osteoclasts

Dafna Geblinger, Lia Addadi and Benjamin Geiger

*Journal of Cell Science* 123, 1814

© 2010. Published by The Company of Biologists Ltd

doi:10.1242/jcs.073411

There was an error in the first e-press version of this article published in *J. Cell Sci.* **123**, 1503-1510.

In the title of the first e-press version of this article, 'Nano-topography' was spelled incorrectly without the h.

We apologise for this mistake.
